# Supplementary material
Source: MDPI journal article supplement (https://www.mdpi.com/2571-9408/6/1/3)
Supplement: s1 [file s1]

## Supplementary Materials

### Dye identification in mounting textiles of traditional Korean paintings from the late Joseon dynasty

Diego Tamburini<sup>1\*</sup> Meejung Kim-Marandet<sup>2</sup> and Sang-ah Kim<sup>3</sup>

<sup>1</sup> Department of Scientific Research, The British Museum, Great Russell Street, London WC1B 3DG, UK

<sup>2</sup> Department of Collection Care, Pictorial Art Conservation, The British Museum, Great Russell Street, London WC1B 3DG, UK

<sup>3</sup> Department of Asia, The British Museum, Great Russell Street, London WC1B 3DG, UK

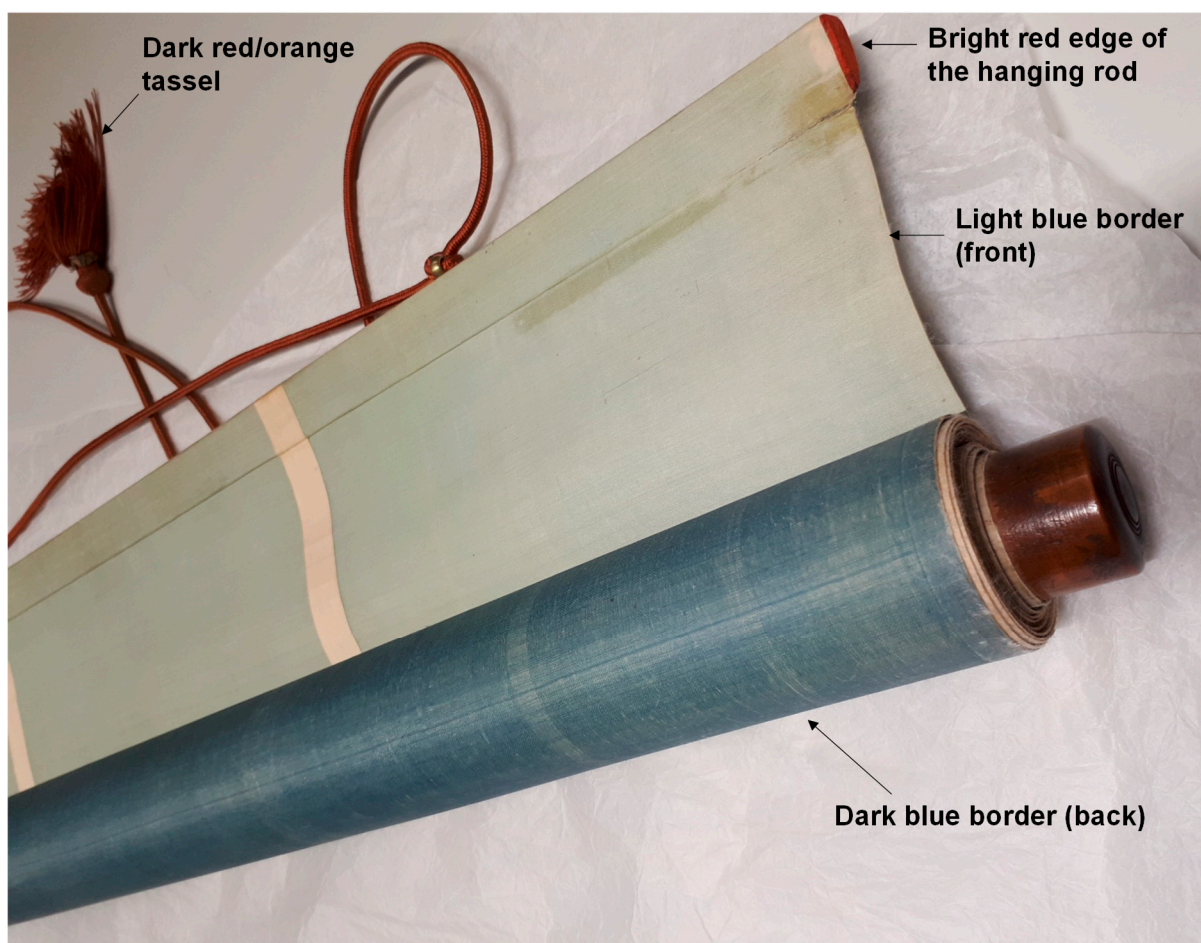

**Figure S1.** Coloured areas of the mounting elements of hanging scroll 1996,0329,0.1 (P1) investigated. © The Trustees of The British Museum.

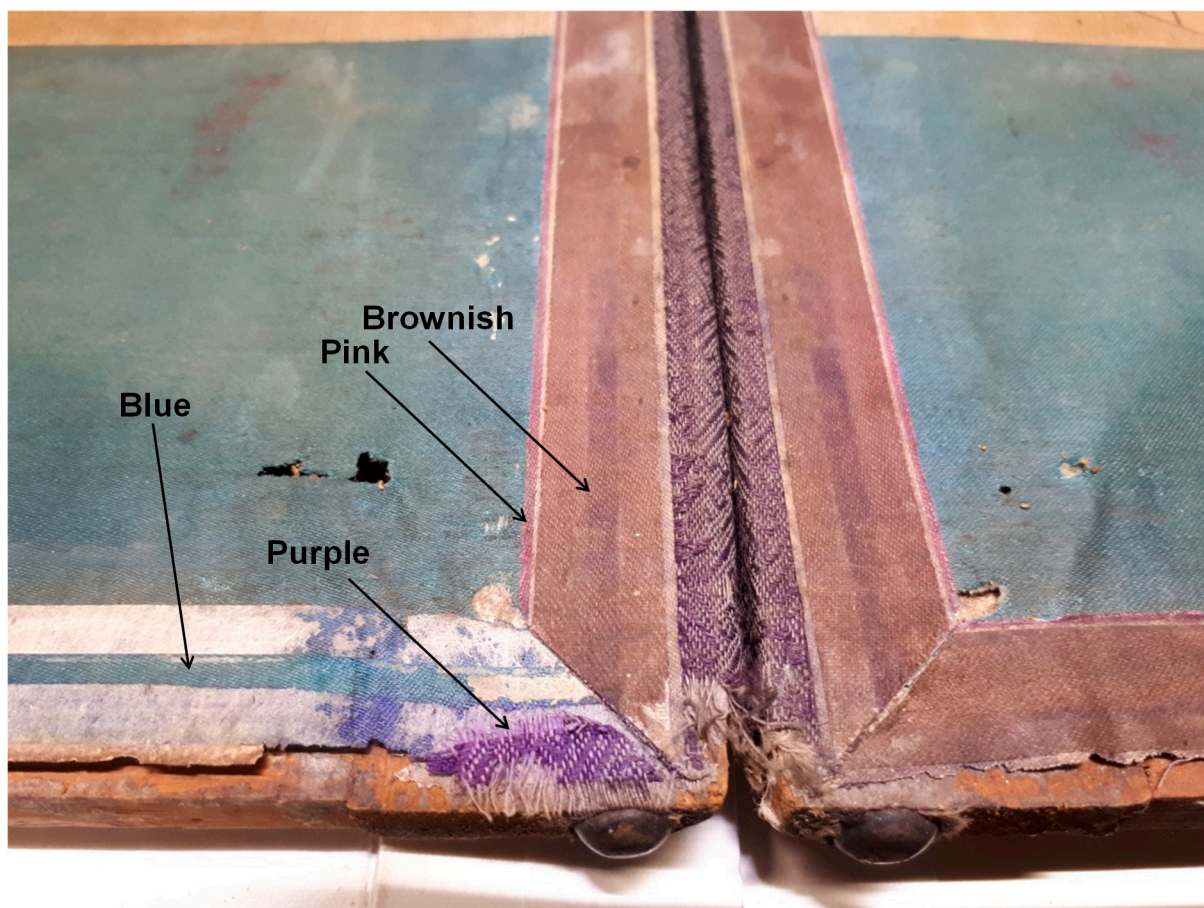

**Figure S2.** Coloured areas of the textile borders of two-panel screen painting 2016,3028.1 (P2) investigated. © The Trustees of The British Museum.



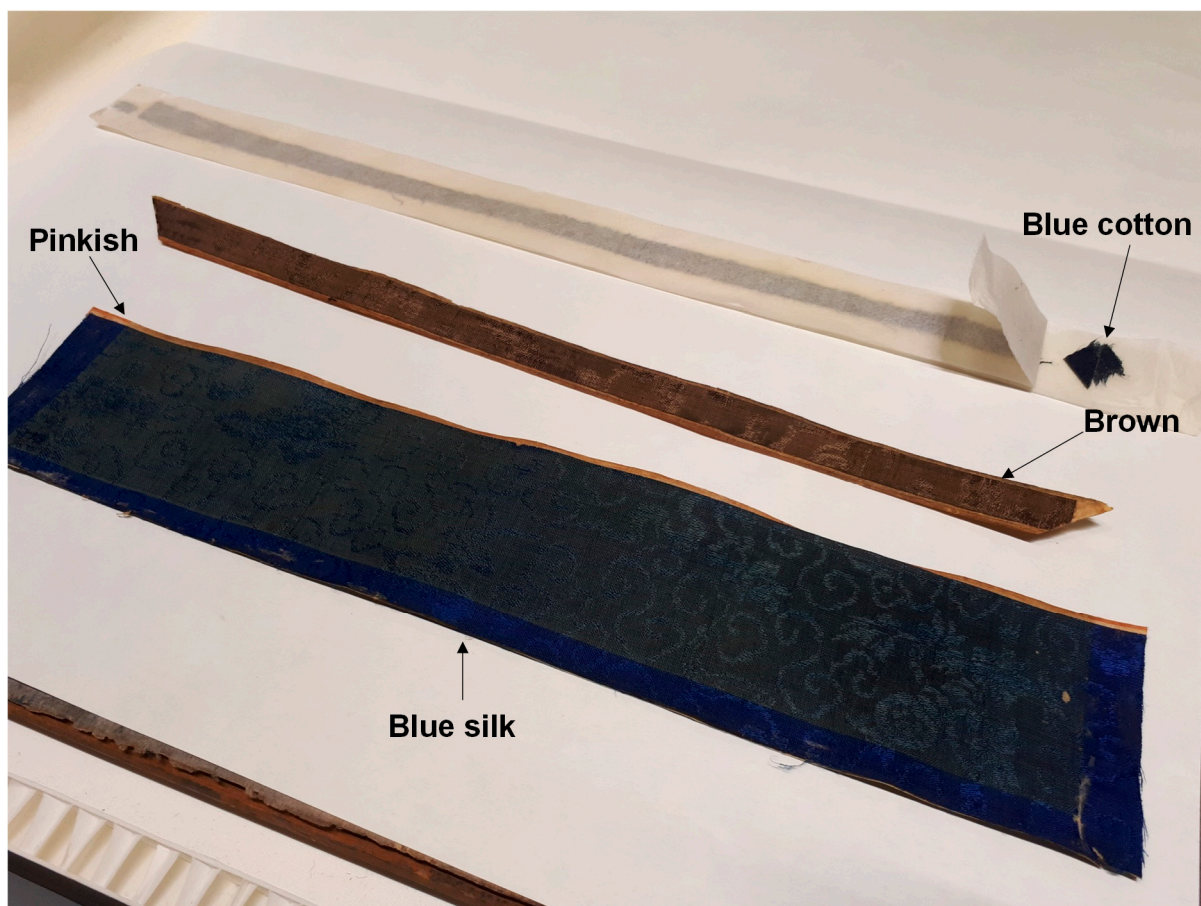

**Figure S3.** Coloured areas of the textile borders of twelve-panel screen painting 1957,1214,0.1 (P3) investigated. © The Trustees of The British Museum.

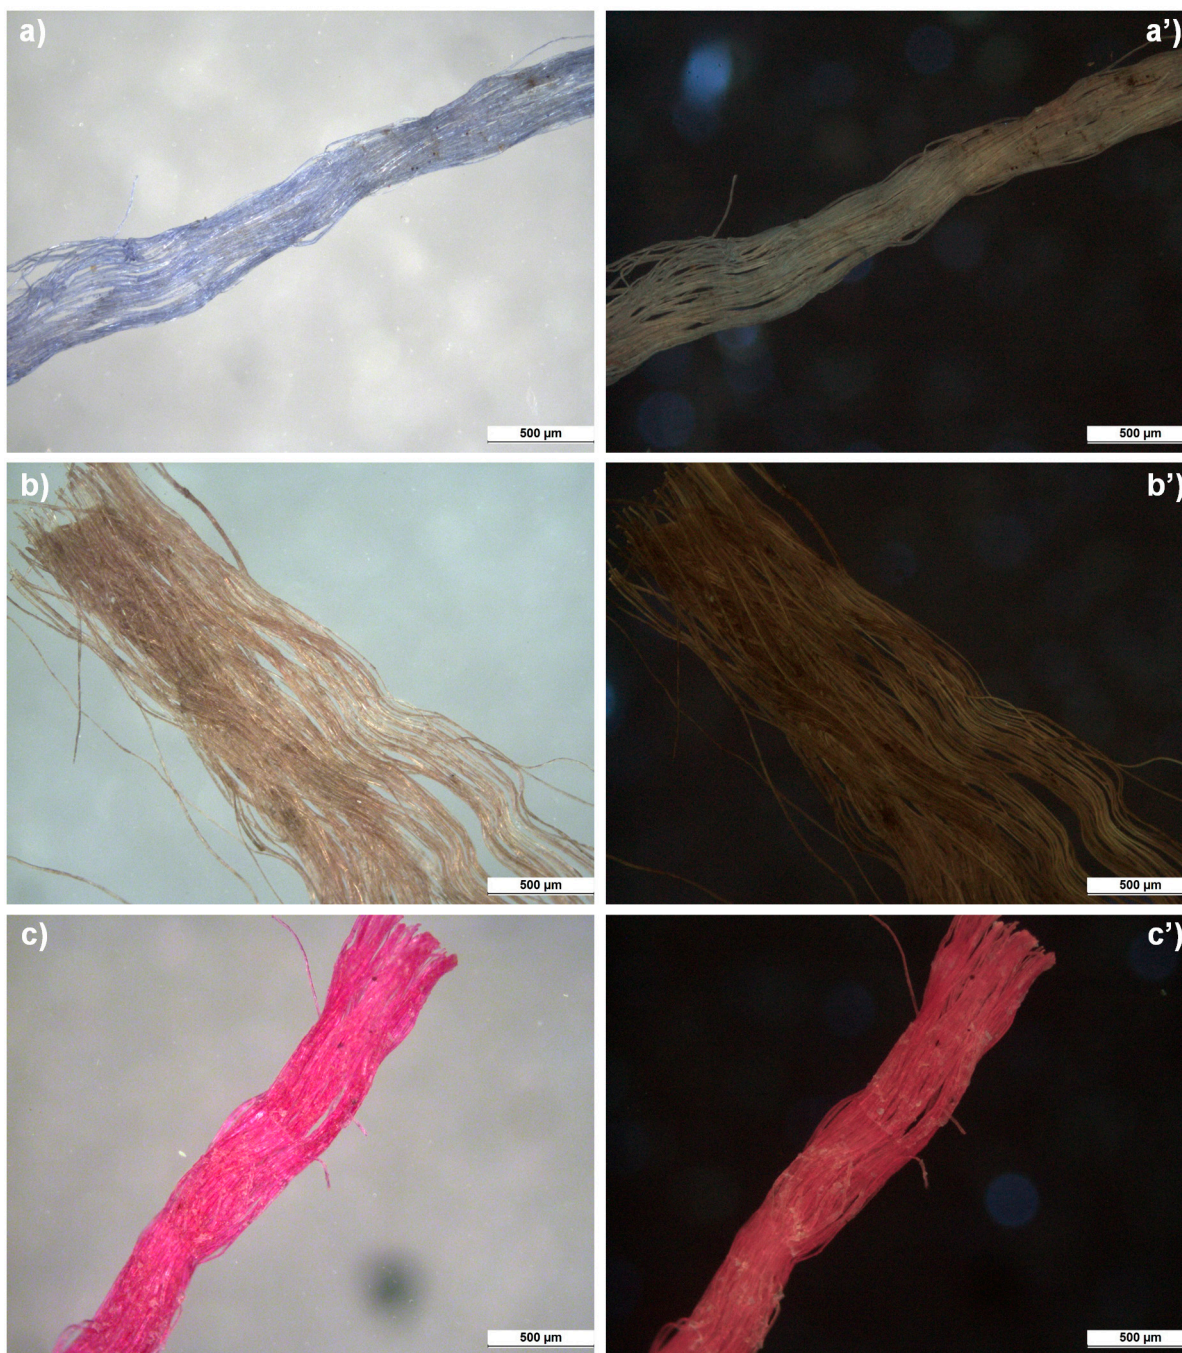

**Figure S4.** Microscopic images of the samples taken from P2 under visible (a, b, c) and UV (a', b', c') light. Image for the purple sample is not available.

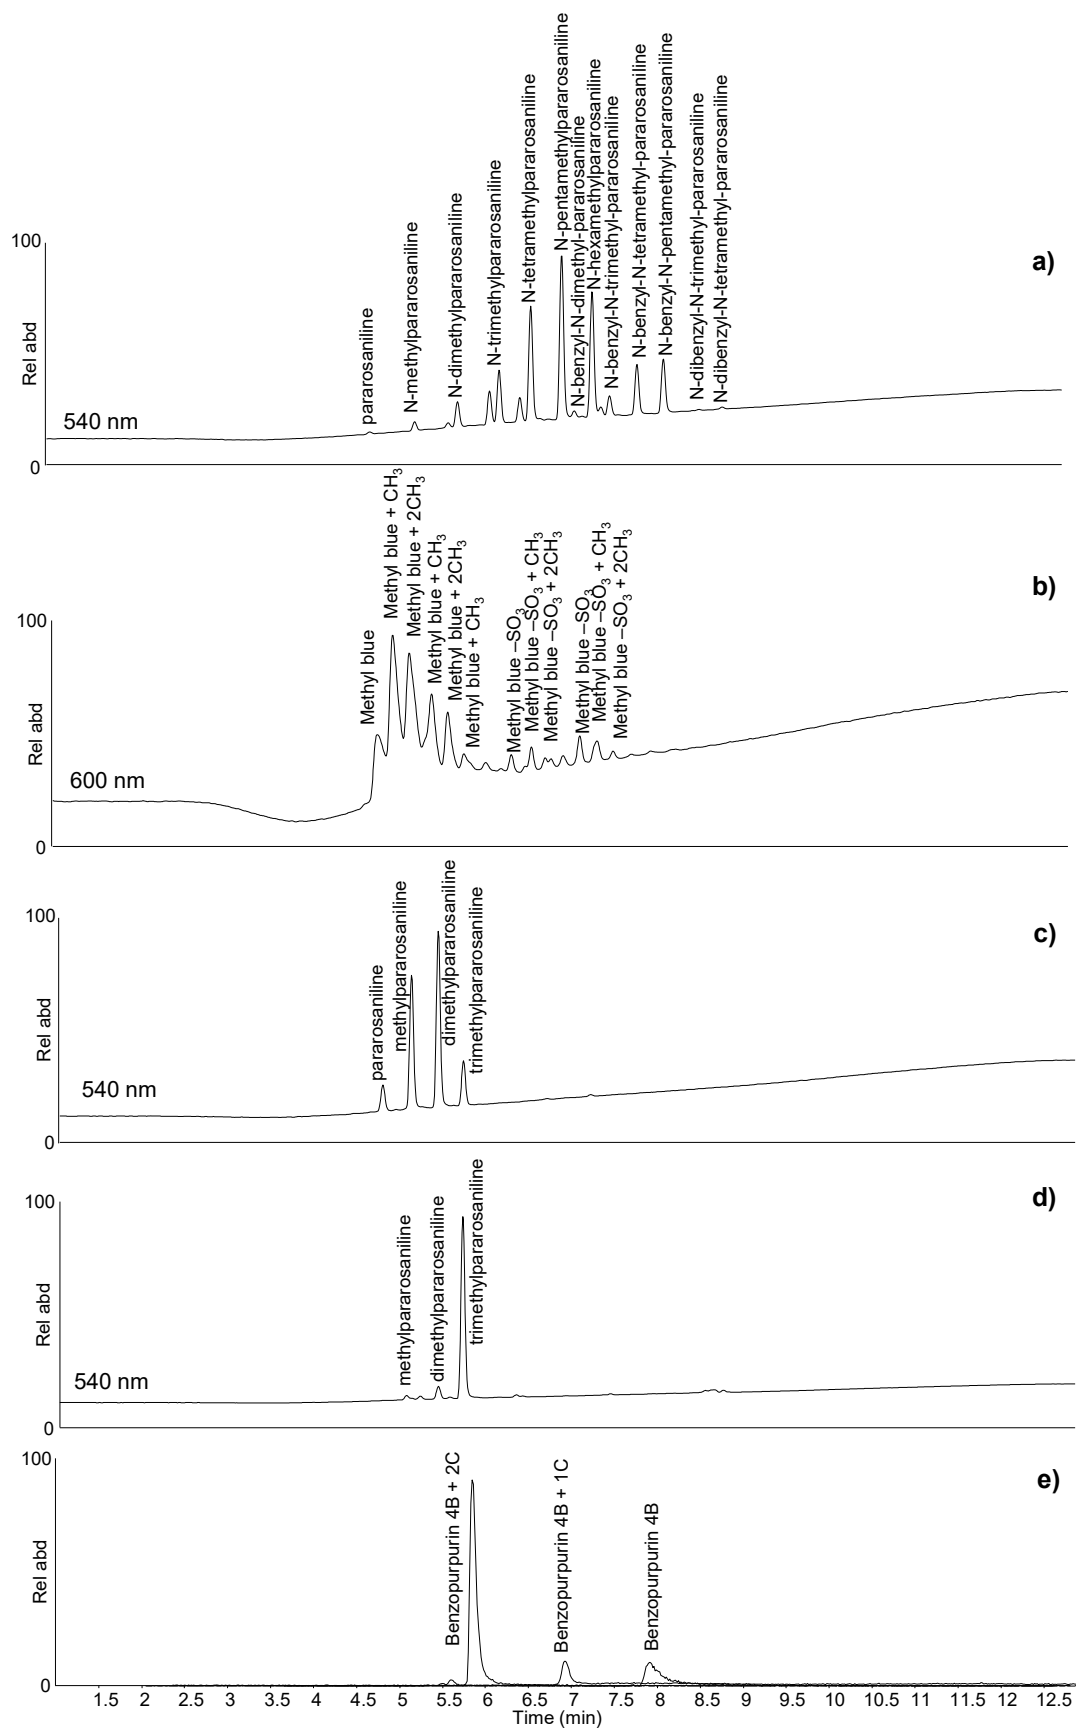

**Figure S5.** DAD chromatograms obtained by HPLC-DAD-MS/MS analysis of **a)** methyl violet 3B, **b)** methyl blue, **c)** magenta, **d)** new magenta. Negative ionisation extracted ion



chromatogram obtained by HPLC-DAD-MS/MS analysis of **e**) benzopurpurin 4B.

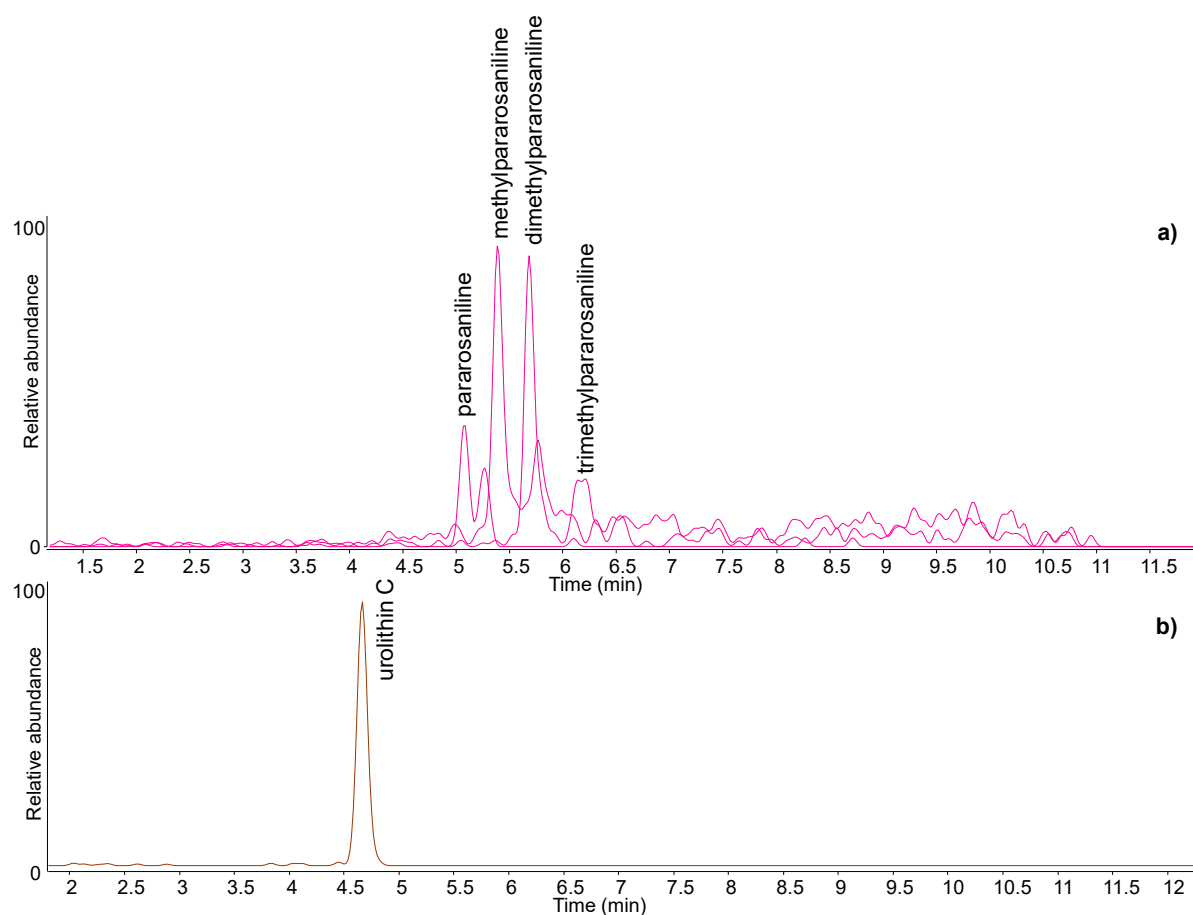

**Figure S6.** Positive ionisation **(a)** and negative ionisation **(b)** extracted ion chromatograms obtained by HPLC-DAD-MS/MS analysis of the brown sample from P2.

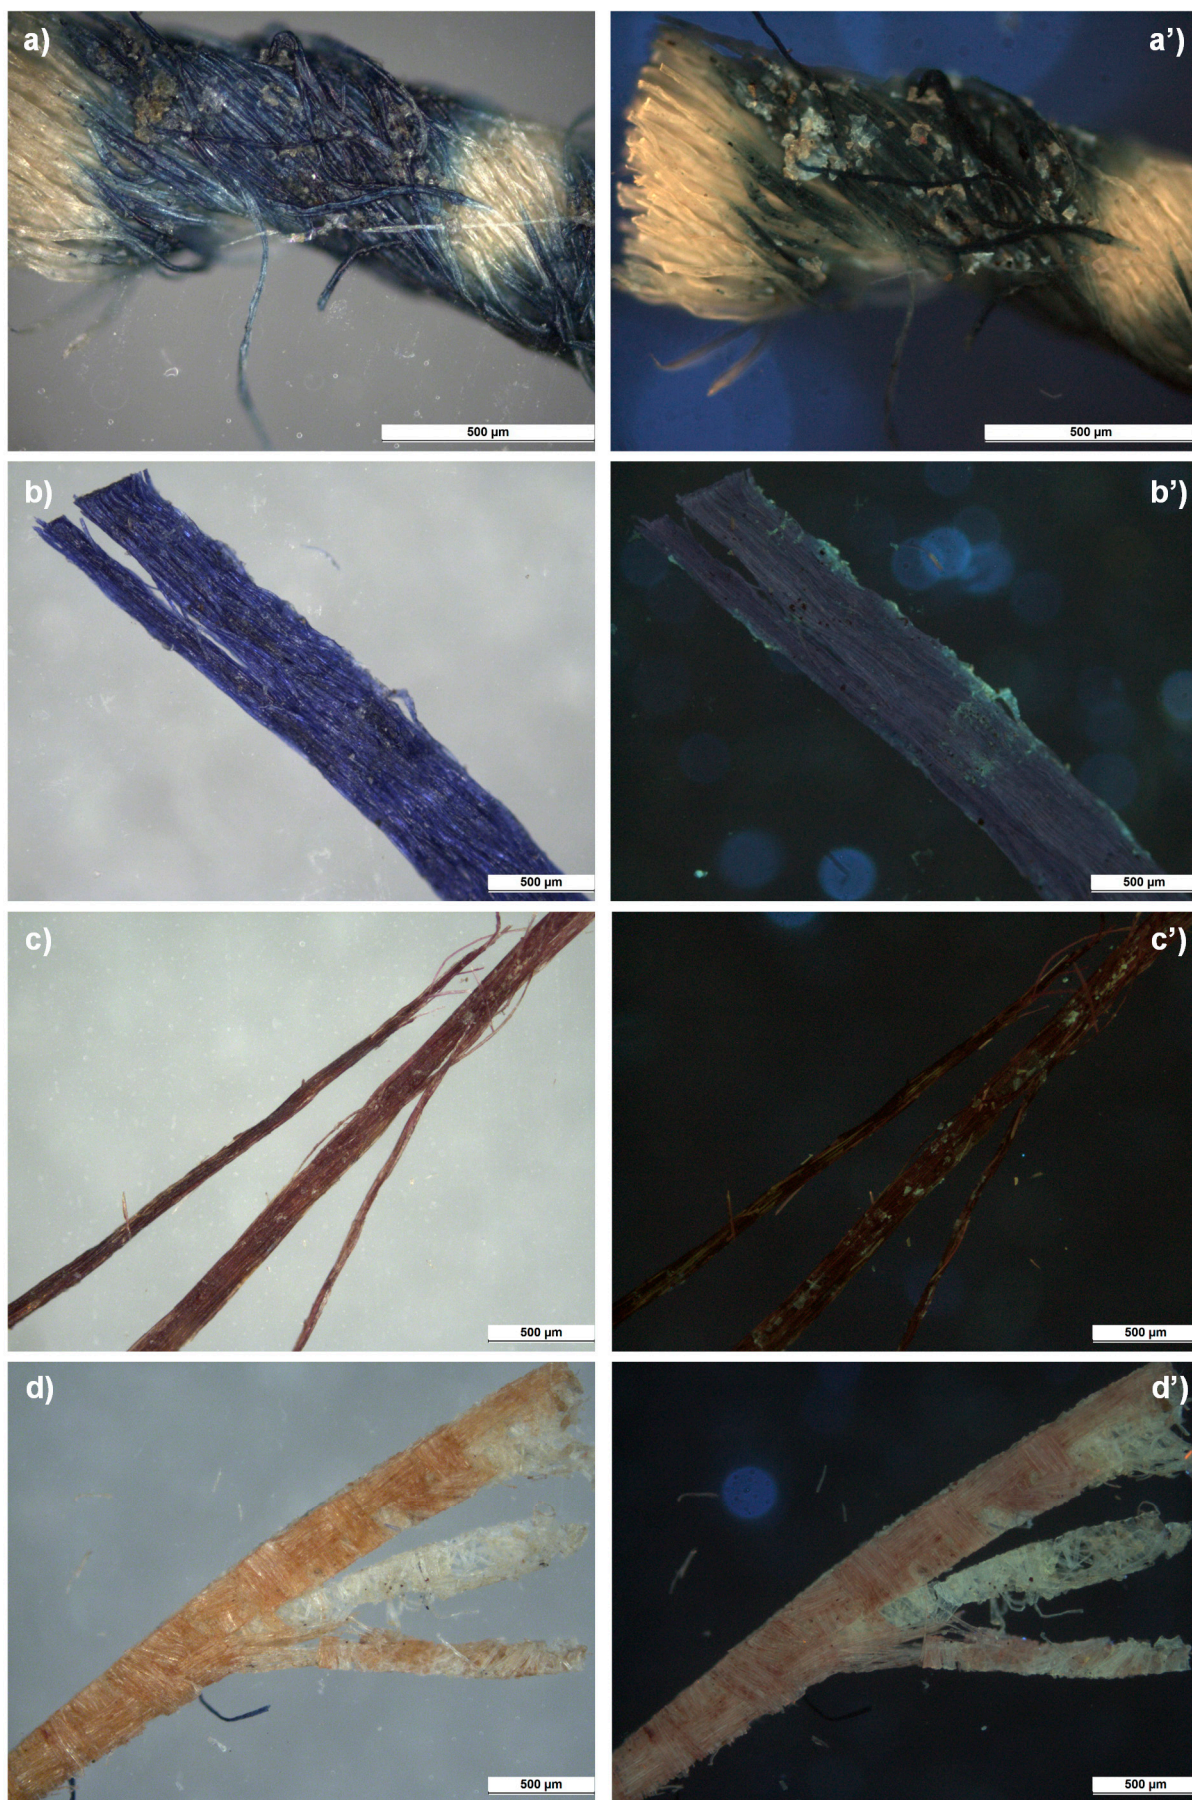

**Figure S7.** Microscopic images of the samples taken from P3 under visible (a, b, c, d) and UV

(a', b', c', d') light. a,a') blue cotton; b,b') blue silk; c,c') brown textile; d,d') pink textile.

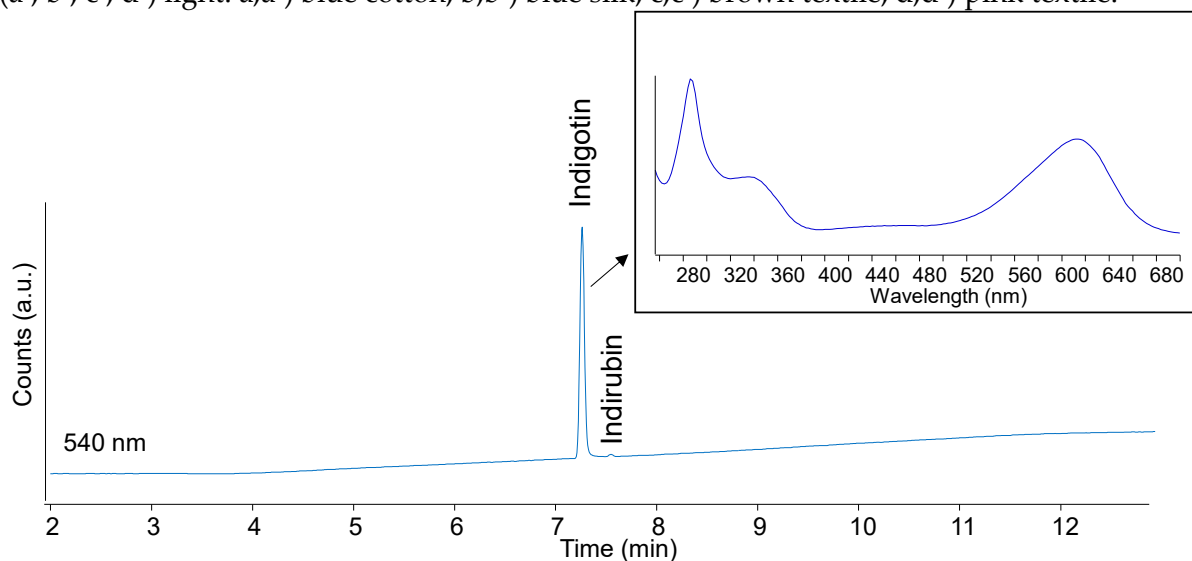

**Figure S8.** DAD chromatogram obtained by HPLC-DAD-MS/MS analysis of the blue cotton sample from P3. The UV-Vis absorption spectrum of indigotin is reported in the insert.

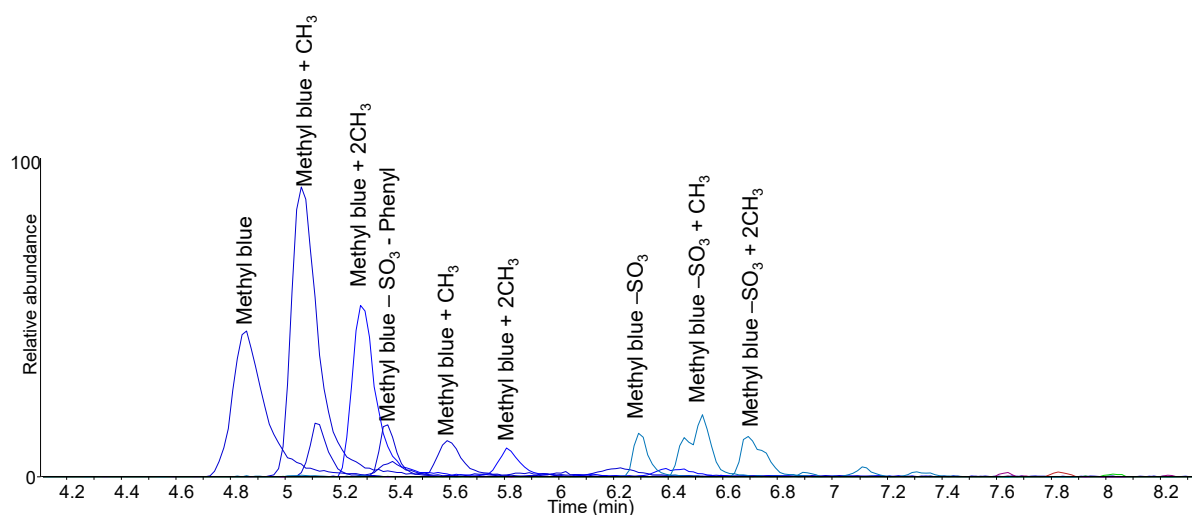

**Figure S9.** Negative ionisation extracted ion chromatograms obtained by HPLC-DAD-MS/MS analysis of the blue silk sample from P3.



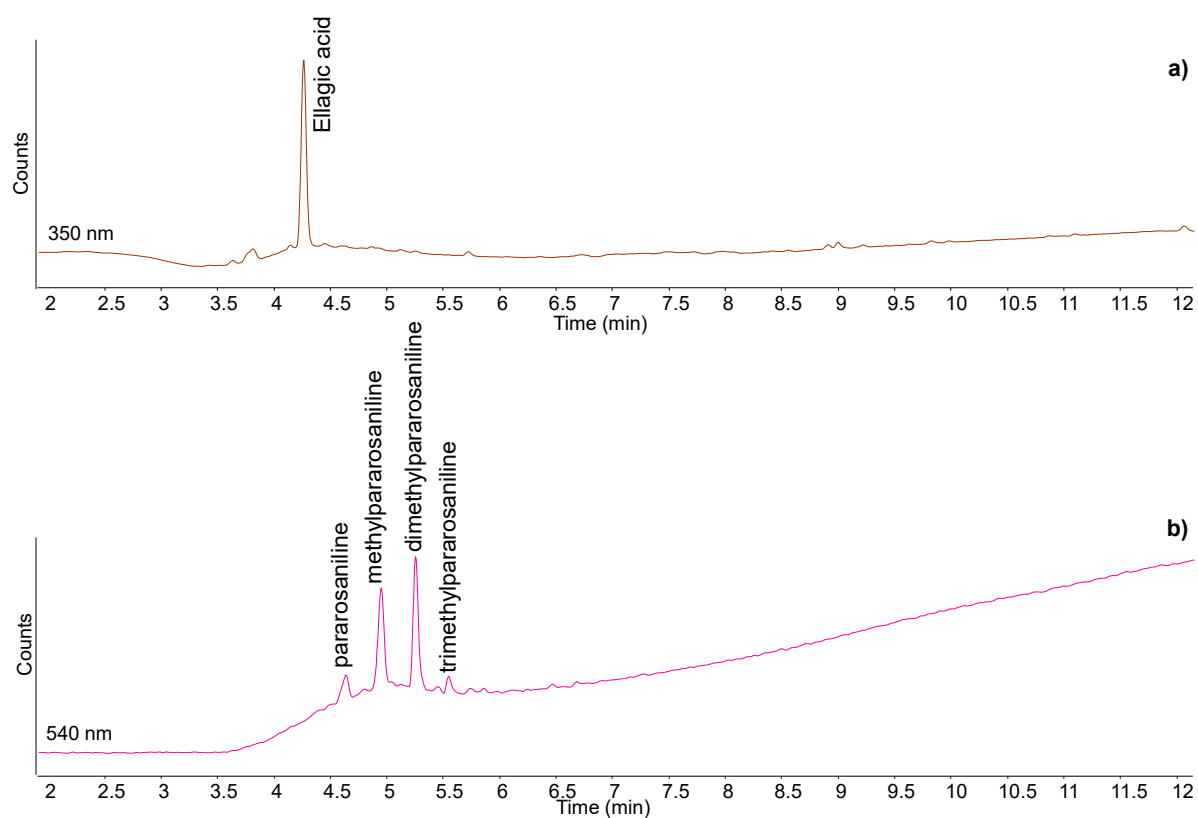

**Figure S10.** DAD chromatograms obtained by HPLC-DAD-MS/MS analysis of the brown sample from P3.
